# Supplementary material
Source: Elsevier journal article supplement (https://rcastoragev2.blob.core.windows.net/fa7822f2b9a0f9b7a2637dbfed6cb492/mmc1.pdf)
Supplement: mmc1 [file mmc1.pdf]

Table S1: Relevance of baseline characteristics to ESRD in the CRIB cohort, given age and sex

| Baseline characteristic                      | Linear model               |                       | Quadratic model               |                       |
|----------------------------------------------|----------------------------|-----------------------|-------------------------------|-----------------------|
|                                              | Direction<br>(linear term) | Improvement<br>in fit | Direction<br>(quadratic term) | Improvement<br>in fit |
| Ln creatinine                                | ++++                       | 314.5                 |                               | 2.0                   |
| Ln cystatin C                                | ++++                       | 201.9                 |                               | 0.6                   |
| Urea                                         | ++++                       | 195.4                 |                               | 1.6                   |
| Ln symmetric dimethylarginine                | ++++                       | 175.8                 |                               | 2.7                   |
| Ln phosphate                                 | ++++                       | 139.5                 | ----                          | 28.7                  |
| Haemoglobin                                  | ----                       | 96.9                  |                               | 1.5                   |
| Ln N-terminal pro-B-type natriuretic peptide | ++++                       | 86.1                  |                               | 1.7                   |
| Ln urinary albumin:creatinine ratio          | ++++                       | 55.9                  |                               | 3.9                   |
| Ln whole parathyroid hormone                 | ++++                       | 37.2                  |                               | 4.7                   |
| Ln 1,25 dihydroxy vitamin D3                 | ----                       | 36.8                  |                               | 0.6                   |
| Ln intact parathyroid hormone                | ++++                       | 36.6                  | ++                            | 7.5                   |
| Ln homocysteine                              | ++++                       | 23.5                  |                               | 0.0                   |
| Ln asymmetric dimethylarginine               | ++++                       | 23.3                  |                               | 0.2                   |
| Elevated troponin T ( $\geq 0.01$ ug/L)      | ++++                       | 19.3                  |                               | .                     |
| Tumour necrosis factor-alpha                 | ++++                       | 18.7                  |                               | 5.0                   |
| Albumin                                      | ----                       | 17.0                  |                               | 1.7                   |
| Ln calcium                                   | ---                        | 13.8                  | ++++                          | 19.5                  |
| Ln 25 hydroxy vitamin D3                     | ---                        | 12.6                  |                               | 0.1                   |
| Total cholesterol                            | --                         | 9.8                   |                               | 0.0                   |
| Fibrinogen                                   | ++                         | 8.0                   |                               | 0.6                   |

Ln = Natural logarithm. +/- indicates the direction of the association (the number of symbols indicates the extent of statistical significance: two [ $p < 0.01$ ]; three [ $p < 0.001$ ]; four [ $p < 0.0001$ ]).

\* Under the null hypothesis of no association, the 'improvement in fit' for each characteristic follows a chi square distribution with 1 degree of freedom. Thus, values  $> 6.6$  are significant at the  $p = 0.01$  level and values  $> 10.8$  are significant at the  $p = 0.001$  level. In total, 44 baseline characteristics were assessed for their predictive value in age- and sex-adjusted analyses, of which the above were all significant at the  $p = 0.01$  level (either in linear models [tested against one degree of freedom] or in quadratic models [tested against 2 degrees of freedom]).
